# Supplementary material
Source: PubMed Central journal article supplement (PMC5951703)
Supplement: 10-1055-s-0037-1607976-s170058.pdf [file 10-1055-s-0037-1607976-s170058.pdf]

**Appendix A** Questions pertinent to paper 2

| Answer options                                                                                                                                                                                 | Response percentage | Response count |
|------------------------------------------------------------------------------------------------------------------------------------------------------------------------------------------------|---------------------|----------------|
| Q24. During vestibular schwannoma surgery, does your center utilize a separate neurophysiology/neuromonitoring team for facial nerve monitoring?                                               |                     |                |
| Yes, routinely use a separate neuromonitoring team                                                                                                                                             | 78.9%               | 45             |
| No, routinely monitored directly by the surgical team using NIMs (or other equivalent) without a separate neurophysiology/neuromonitoring team                                                 | 21.1%               | 12             |
| Q25. During surgery for small- to medium-sized vestibular schwannomas (<2.5 cm), what motor cranial nerves does your center typically monitor? (Mark all that apply)                           |                     |                |
| Trigeminal motor (V3)                                                                                                                                                                          | 31.6%               | 18             |
| Facial nerve (VII)                                                                                                                                                                             | 98.2%               | 56             |
| Vagus nerve (X)                                                                                                                                                                                | 12.3%               | 7              |
| Spinal accessory nerve (XI)                                                                                                                                                                    | 12.3%               | 7              |
| Hypoglossal nerve (XII)                                                                                                                                                                        | 3.5%                | 2              |
| Q26. When performing hearing preservation surgery for vestibular schwannoma, which of the following describes your approach to eighth nerve monitoring? (Please choose the single best answer) |                     |                |
| I do not monitor the eighth cranial nerve, even when attempting to preserve hearing                                                                                                            | 12.3%               | 7              |
| Far field eighth nerve monitoring (ABR/BAER)                                                                                                                                                   | 71.9%               | 41             |
| Direct eighth nerve monitoring (lead wire on eighth nerve or cochlear nucleus)                                                                                                                 | 15.8%               | 9              |
| Q33. As a general rule, which surgical approaches do you use pinions (rigid fixation) during vestibular schwannoma surgery? (Mark all that apply)                                              |                     |                |
| Retrosigmoid approach                                                                                                                                                                          | 86.0%               | 49             |
| Translabyrinthine approach                                                                                                                                                                     | 26.3%               | 15             |
| Middle cranial fossa approach                                                                                                                                                                  | 42.1%               | 24             |
| Do not typically use pinions                                                                                                                                                                   | 10.5%               | 6              |
| Q34. Do you use a cerebellar retractor during retrosigmoid vestibular schwannoma surgery? (Please choose the single best answer)                                                               |                     |                |
| Always                                                                                                                                                                                         | 21.1%               | 12             |
| At least 50% of the time                                                                                                                                                                       | 21.1%               | 12             |
| Rarely                                                                                                                                                                                         | 28.1%               | 16             |
| Never                                                                                                                                                                                          | 28.1%               | 16             |
| Not applicable, I do not use this approach                                                                                                                                                     | 1.8%                | 1              |
| Q35. Do you use a cerebellar retractor during translabyrinthine vestibular schwannoma surgery? (Please choose the single best answer)                                                          |                     |                |
| Always                                                                                                                                                                                         | 5.3%                | 3              |
| At least 50% of the time                                                                                                                                                                       | 8.8%                | 5              |
| Rarely                                                                                                                                                                                         | 28.1%               | 16             |
| Never                                                                                                                                                                                          | 52.6%               | 30             |
| Not applicable, I do not use this approach                                                                                                                                                     | 5.3%                | 3              |
| Q36. What patient positioning do you utilize during retrosigmoid vestibular schwannoma surgery? (Please choose the single best answer)                                                         |                     |                |
| Lateral decubitus (park bench)                                                                                                                                                                 | 33.3%               | 19             |
| Supine with head turn (with or without shoulder bump)                                                                                                                                          | 49.1%               | 28             |
| Either, depending on case                                                                                                                                                                      | 14.0%               | 8              |
| Sitting or semisitting                                                                                                                                                                         | 1.8%                | 1              |
| Prone                                                                                                                                                                                          | 1.8%                | 1              |
| Not applicable, I do not use this approach                                                                                                                                                     | 0.0%                | 0              |

**Appendix A** (Continued)

| Answer options                                                                                                                                          | Response percentage | Response count |
|---------------------------------------------------------------------------------------------------------------------------------------------------------|---------------------|----------------|
| Q37. What patient position do you typically utilize during translabyrinthine vestibular schwannoma surgery? (Please choose the single best answer)      |                     |                |
| Lateral decubitus (park bench)                                                                                                                          | 5.3%                | 3              |
| Supine with head turn (with or without shoulder bump)                                                                                                   | 86.0%               | 49             |
| Either, depending on case                                                                                                                               | 5.3%                | 3              |
| Sitting or semisitting                                                                                                                                  | 0.0%                | 0              |
| Prone                                                                                                                                                   | 0.0%                | 0              |
| Not applicable, I do not use this approach                                                                                                              | 3.5%                | 2              |
| Q38. What is the most common method you utilize to internally debulk a large vestibular schwannoma? (Please choose the single best answer)              |                     |                |
| Ultrasonic aspirator (CUSA or similar)                                                                                                                  | 82.5%               | 47             |
| Tumor forceps and suction                                                                                                                               | 8.8%                | 5              |
| Laser                                                                                                                                                   | 0.0%                | 0              |
| Microdebrider system                                                                                                                                    | 3.5%                | 2              |
| Scissors                                                                                                                                                | 5.3%                | 3              |
| Q39. During vestibular schwannoma surgery, do you use antibiotic irrigation? (Please choose the single best answer)                                     |                     |                |
| Yes, always or most of the time                                                                                                                         | 42.1%               | 24             |
| Yes, sometimes (~50% of the time)                                                                                                                       | 10.5%               | 6              |
| No, rarely or never                                                                                                                                     | 47.4%               | 27             |
| Q40. Do you use an endoscope during vestibular schwannoma surgery? (Please choose the single best answer)                                               |                     |                |
| No, rarely or never (only use microscope)                                                                                                               | 63.2%               | 36             |
| Yes, exclusively (only use endoscope)                                                                                                                   | 0.0%                | 0              |
| Yes, use it in select circumstances such as hearing preservation to view the fundus                                                                     | 36.8%               | 21             |
| Q43. For retrosigmoid approaches, do you perform craniotomy or craniectomy? (Please choose the single best answer)                                      |                     |                |
| Craniotomy with replacement of bone flap                                                                                                                | 57.9%               | 33             |
| Craniectomy without reconstruction                                                                                                                      | 3.5%                | 2              |
| Craniectomy with mesh reconstruction                                                                                                                    | 26.3%               | 15             |
| Craniectomy with bone cement (methylmethacrylate reconstruction)                                                                                        | 0.0%                | 0              |
| Craniectomy with other reconstruction                                                                                                                   | 12.3%               | 7              |
| Q44. When closing a translabyrinthine approach, which of the following techniques do you employ to mitigate the risk of CSF leak? (Mark all that apply) |                     |                |
| Fat graft                                                                                                                                               | 94.7%               | 54             |
| Bone cement (any form)                                                                                                                                  | 5.3%                | 3              |
| Bone pate                                                                                                                                               | 8.8%                | 5              |
| Artificial dural substitute                                                                                                                             | 21.1%               | 12             |
| Reapproximate and close dural leaflets over posterior fossa                                                                                             | 36.8%               | 21             |
| Pack the Eustachian tube and middle ear space with muscle or fascia                                                                                     | 64.9%               | 37             |
| Block the mastoid antrum with fascia or other similar substrate                                                                                         | 42.1%               | 24             |
| Overclose the ear canal and directly pack the Eustachian tube (primary surgery, not for treating postoperative CSF leak)                                | 3.5%                | 2              |
| Absorbable mesh over fat graft                                                                                                                          | 8.8%                | 5              |
| Titanium mesh over fat graft                                                                                                                            | 24.6%               | 14             |
| Head wrap                                                                                                                                               | 54.4%               | 31             |

(Continued)

**Appendix A** (Continued)

| Answer options                                                                                                                                                                                     | Response percentage | Response count |
|----------------------------------------------------------------------------------------------------------------------------------------------------------------------------------------------------|---------------------|----------------|
| Q53. As a general rule, what is your initial preferred treatment of postoperative CSF leak in a patient with nonserviceable hearing? (Please choose the single best answer)                        |                     |                |
| Conservative measures (bed rest, lifting restrictions, etc.)                                                                                                                                       | 8.8%                | 5              |
| Acetazolamide (Diamox)                                                                                                                                                                             | 1.8%                | 1              |
| Lumbar drain                                                                                                                                                                                       | 77.2%               | 44             |
| Ear canal blind sac closure and packing of Eustachian tube without lumbar drain trial                                                                                                              | 12.3%               | 7              |
| Q54. When you have a patient with profound facial weakness after vestibular schwannoma resection, what initial management strategy do you typically employ? (Please choose the single best answer) |                     |                |
| Refer for upfront tarsorrhaphy                                                                                                                                                                     | 15.8%               | 9              |
| Refer for upfront gold/platinum weight placement                                                                                                                                                   | 49.1%               | 28             |
| Continue aggressive eye cares alone                                                                                                                                                                | 35.1%               | 20             |
| Q55. What do you perceive to be the primary cause of delayed facial nerve weakness following microsurgical resection of vestibular schwannoma? (Please choose the single best answer)              |                     |                |
| Vasospasm                                                                                                                                                                                          | 17.5%               | 10             |
| Reactivation of latent virus (e.g., herpes simplex) in geniculate ganglion                                                                                                                         | 19.3%               | 11             |
| Tracking neural edema from surgical site to narrow labyrinthine segment of facial nerve                                                                                                            | 61.4%               | 35             |
| Free pulsating movement of facial nerve in the CPA after tumor removal                                                                                                                             | 1.8%                | 1              |
| Q56. Do you utilize postoperative antiretroviral therapy after vestibular schwannoma resection? (Please choose the single best answer)                                                             |                     |                |
| Yes, routinely or most of the time                                                                                                                                                                 | 14.0%               | 8              |
| Yes, sometimes (~50% of the time)                                                                                                                                                                  | 10.5%               | 6              |
| No, rarely or never                                                                                                                                                                                | 75.4%               | 43             |
| Q58. How long do you utilize steroids after vestibular schwannoma resection? (Please choose the single best answer)                                                                                |                     |                |
| Do not routinely use postoperative steroids                                                                                                                                                        | 19.3%               | 11             |
| 1–3 d                                                                                                                                                                                              | 19.3%               | 11             |
| 4–7 d                                                                                                                                                                                              | 31.6%               | 18             |
| 8–14 d                                                                                                                                                                                             | 29.8%               | 17             |
| 15–21 d                                                                                                                                                                                            | 0.0%                | 0              |
| 21 d or longer                                                                                                                                                                                     | 0.0%                | 0              |
| Q59. Do you use postoperative chemical DVT prophylaxis (e.g., subcutaneous heparin) after vestibular schwannoma surgery? (Please choose the single best answer)                                    |                     |                |
| Yes, in most or all cases                                                                                                                                                                          | 56.1%               | 32             |
| Yes, in high-risk patients                                                                                                                                                                         | 12.3%               | 7              |
| No, rarely or never                                                                                                                                                                                | 31.6%               | 18             |
| Q60. When do you typically start postoperative chemical DVT prophylaxis (e.g., subcutaneous heparin) following vestibular schwannoma surgery? (Please choose the single best answer)               |                     |                |
| Within the first 24 h of surgery                                                                                                                                                                   | 40.4%               | 23             |
| 1–3 d after surgery                                                                                                                                                                                | 28.1%               | 16             |
| 4–7 d after surgery                                                                                                                                                                                | 3.5%                | 2              |
| Only after a week from surgery                                                                                                                                                                     | 1.8%                | 1              |
| NA, rarely or never use chemical DVT prophylaxis following vestibular schwannoma surgery                                                                                                           | 26.3%               | 15             |

**Appendix A** (Continued)

| Answer options                                                                                                                                          | Response percentage | Response count |
|---------------------------------------------------------------------------------------------------------------------------------------------------------|---------------------|----------------|
| Q61. Do you utilize postoperative antibiotics following vestibular schwannoma surgery? (Please choose the single best answer)                           |                     |                |
| Yes, in most or all cases                                                                                                                               | 64.9%               | 37             |
| Yes, in high-risk patients                                                                                                                              | 0.0%                | 0              |
| No, rarely or never                                                                                                                                     | 35.1%               | 20             |
| Q62. How long do you use postoperative antibiotics following vestibular schwannoma surgery?(Please choose the single best answer)                       |                     |                |
| Only for 24 h                                                                                                                                           | 42.1%               | 24             |
| 1–3 d after surgery                                                                                                                                     | 22.8%               | 13             |
| 4–7 d after surgery                                                                                                                                     | 3.5%                | 2              |
| > 1 wk                                                                                                                                                  | 1.8%                | 1              |
| NA, antibiotics are rarely or never used following vestibular schwannoma surgery                                                                        | 29.8%               | 17             |
| Q63. When do you obtain your first postoperative MRI scan following gross total vestibular schwannoma resection? (Please choose the single best answer) |                     |                |
| < 48 h                                                                                                                                                  | 36.8%               | 21             |
| > 2 d, but within 1 mo                                                                                                                                  | 7.0%                | 4              |
| Between 1 and 6 mo                                                                                                                                      | 36.8%               | 21             |
| Between 7 and 12 mo                                                                                                                                     | 8.8%                | 5              |
| After 1 y                                                                                                                                               | 10.5%               | 6              |
| Q64. In your practice, when do most patients return to work after vestibular schwannoma surgery? (Please choose the single best answer)                 |                     |                |
| Within 2 wk                                                                                                                                             | 3.5%                | 2              |
| Approximately 1 mo                                                                                                                                      | 28.1%               | 16             |
| Approximately 6 wk                                                                                                                                      | 47.4%               | 27             |
| Approximately 3 mo                                                                                                                                      | 21.1%               | 12             |
| Approximately 6 mo                                                                                                                                      | 0.0%                | 0              |
| > 6 mo                                                                                                                                                  | 0.0%                | 0              |

Abbreviations: ABR, auditory brain stem response; BAER, brain stem auditory evoked response; CPA, cerebellopontine angle; CSF, cerebrospinal fluid; CUSA, Cavitron ultrasonic surgical aspirator; DVT, deep vein thrombosis; MRI, magnetic resonance imaging.
